# Supplementary material
Source: publisher site journal article supplement (https://www.spandidos-publications.com/6806/downloadSupplementary)
Supplement: Supplementary file 1 [file downloadSupplementary]

## Sheet: Sheet1
Table SXIII. Kyoto Enyclopedia of Genes and Genomes pathway corresponding to target genes of upregulated piwi-interacting RNAs.
Term	Overlap	P-value	Adjusted P-value	Odds ratio	Combined score	Gene
Tryptophan metabolism	1942-01-01	0.0208071	0.0692086	54.0623	209.354	GCDH
Fatty acid degradation	1943-01-01	0.0212978	0.0692086	52.7725	203.129	GCDH
Glycerolipid metabolism	1961-01-01	0.0300913	0.0692086	36.9074	129.306	DGKG
Lysine degradation	1963-01-01	0.0310639	0.0692086	35.7133	123.986	GCDH
Phosphatidylinositol signaling system	1997-01-01	0.0474653	0.0692086	23.0255	70.176	DGKG
Choline metabolism in cancer	1998-01-01	0.0479439	0.0692086	22.7869	69.2204	DGKG
Glycerophospholipid metabolism	1998-01-01	0.0479439	0.0692086	22.7869	69.2204	DGKG
Protein digestion and absorption	1/103	0.0503336	0.0692086	21.6645	64.757	SLC36A3
Phospholipase D signaling pathway	1/148	0.0715991	0.0838928	14.9985	39.5461	DGKG
Ribosome	1/158	0.0762662	0.0838928	14.0361	36.1222	RPL41
Coronavirus disease	1/232	0.110152	0.110152	9.50409	20.9651	RPL41
